# Supplementary material for: Modified PAMAM dendrimers as a matrix for the photostabilization of curcumin
Source: Royal Society of Chemistry journal article supplement (doi:10.1039/d0nj02737e), 2020-01-01
Supplement: d0nj02737e1.pdf [file d0nj02737e1.pdf]

## Supplementary Information

### Modified PAMAM dendrimers as matrix for photostabilization of curcumin

Mohammad Dodangeh<sup>a,b,\*</sup>, Ivo Grabchev<sup>c,\*</sup>, Kamaladin Gharanjig<sup>a,d,\*</sup>, Desislava Staneva<sup>c</sup>, Ren-Cheng Tang<sup>b</sup>, Matthew Sheridan<sup>f</sup>

<sup>a</sup>Department of Organic Colorants, Institute for Color Science and Technology, Tehran 16765-654, Iran.

<sup>b</sup>National Engineering Laboratory for Modern Silk, College of Textile and Clothing Engineering, Soochow University, 199 Renai Road, Suzhou 215123, China.

<sup>c</sup>Sofia University "St. Kliment Ohridski", Faculty of Medicine, Sofia 1407, Bulgaria.

<sup>d</sup>Center of Excellence for Color Science and Technology, Institute for Color Science and Technology, Tehran 16765-654, Iran.

<sup>e</sup>University of Chemical Technology and Metallurgy, 1756 Sofia, Bulgaria.

<sup>f</sup>Department of Chemistry, Florida University, United States.

\*Corresponding author: [i.grabchev@chem.uni-sofia.bg](mailto:i.grabchev@chem.uni-sofia.bg)

**Table S1.** List of chemicals used in this study.

| Chemicals                 | Manufacturer  |
|---------------------------|---------------|
| Ethylenediamine           | Sigma-Aldrich |
| Methyl acrylate           | Sigma-Aldrich |
| Fluorescein               | Sigma-Aldrich |
| Curcumin                  | Sigma-Aldrich |
| Triethylamine             | Sigma-Aldrich |
| Cyanuric chloride         | Sigma-Aldrich |
| 2,4-dihydroxybenzophenone | Sigma-Aldrich |
| Hydrochloric acid         | Sigma-Aldrich |
| Sodium hydroxide          | Sigma-Aldrich |
| 1,4-Dioxane               | Sigma-Aldrich |
| Acetone                   | Sigma-Aldrich |
| Ethanol                   | Sigma-Aldrich |
| Methanol                  | Sigma-Aldrich |
| N,N-dimethylformamide     | Sigma-Aldrich |
| 2,4-dihydroxybenzophenone | Sigma-Aldrich |

**Table S2.** detailed information of instruments applied for characterization of CU-1, CU-2, CU-3, CU-4, CU-5 and CU-6.

| Characterization  | Instrument                                                               |
|-------------------|--------------------------------------------------------------------------|
| UV-Vis properties | UV-Vis Cecil9200 double beam spectrophotometer                           |
| Functional groups | Perkin Elmer Spectrum One (FTIR)                                         |
| Different protons | Bruker DRX AVANCE spectrometer at 500 MHz ( <sup>1</sup> HNMR)           |
| Different carbons | Bruker DRX AVANCE spectrometer at 500 MHz ( <sup>13</sup> CNMR)          |
| C H N (%)         | Heraeus Elemental Analyzer CHN-O-Rapid (Elementar-Analysensysteme, GmbH) |
| Melting point     | Perkin Elmer Pyris 6 Differential Scanning Calorimeter (DSC)             |
| Quantum yeild     | Osean Optics Usb2000flg fluorometer                                      |
| pH                | Metrohm 691 digital pH meter                                             |

**Table S3.** synthesis condition of CU-1, CU-2, CU-3, CU-4, CU-5 and CU-6 in detail.

| Compound | First material | Amount (mmol) | M-OH (cm <sup>3</sup> ) | MA (mmol) | EDA (mol) | t(h) | T (°C) | THF (cm <sup>3</sup> ) | CC (mmol) | Cur (mmol) | DHB (mmol) |
|----------|----------------|---------------|-------------------------|-----------|-----------|------|--------|------------------------|-----------|------------|------------|
| P-G-0.5  | EDA            | 16.6          | 50                      | 68        | -         | 168  | 25     | -                      | -         | -          | -          |
| P-G0     | G-0.5          | 12.5          | 50                      | -         | 1.48      | 168  | 25     | -                      | -         | -          | -          |
| P-G0.5   | G0             | 1.27          | 20                      | 11.6      | -         | 96   | 25     | -                      | -         | -          | -          |
|          |                |               |                         |           |           | 24   | 45     | -                      | -         | -          | -          |
| P-G1     | G0.5           | 11.75         | 100                     | -         | 4.51      | 144  | 25     | -                      | -         | -          | -          |
| P-G1.5   | G1             | 1.35          | 20                      | 43.5      | -         | 96   | 25     | -                      | -         | -          | -          |
|          |                |               |                         |           |           | 24   | 45     | -                      | -         | -          | -          |
| P-G2     | G1.5           | 1.35          | 50                      | -         | 1.2       | 144  | 25     | -                      | -         | -          | -          |
| CU-1     | G0             | 2.7           | -                       | -         | -         | 3    | 5      | 50                     | 10.8      | -          | -          |
|          |                |               |                         |           |           | 24   | 35     | 50                     | -         | 10.8       | -          |
|          |                |               |                         |           |           | 24   | 75     | 50                     | -         | 10.8       | -          |
| CU-2     | G1             | 2.7           | -                       | -         | -         | 3    | 5      | 50                     | 10.8      | -          | -          |
|          |                |               |                         |           |           | 24   | 35     | 50                     | -         | 10.8       | -          |
|          |                |               |                         |           |           | 24   | 75     | 50                     | -         | 10.8       | -          |
| CU-3     | G2             | 2.7           | -                       | -         | -         | 3    | 5      | 50                     | 10.8      | -          | -          |
|          |                |               |                         |           |           | 24   | 35     | 50                     | -         | 10.8       | -          |
|          |                |               |                         |           |           | 24   | 75     | 50                     | -         | 10.8       | -          |
| CU-4     | G0             | 2.7           | -                       | -         | -         | 3    | 5      | 50                     | 10.8      | -          | -          |
|          |                |               |                         |           |           | 24   | 35     | 50                     | -         | 10.8       | -          |
|          |                |               |                         |           |           | 24   | 75     | 50                     | -         | 10.8       | 10.8       |
| CU-5     | G1             | 2.7           | -                       | -         | -         | 3    | 5      | 50                     | 10.8      | -          | -          |
|          |                |               |                         |           |           | 24   | 35     | 50                     | -         | 10.8       | -          |
|          |                |               |                         |           |           | 24   | 75     | 50                     | -         | -          | 10.8       |
| CU-6     | G2             | 2.7           | -                       | -         | -         | 3    | 5      | 50                     | 10.8      | -          | -          |
|          |                |               |                         |           |           | 24   | 35     | 50                     | -         | 10.8       | -          |
|          |                |               |                         |           |           | 24   | 75     | 50                     | -         | -          | 10.8       |

\*EDA: Ethylenediamine, M-OH: Methanol, MA: Methyl acrylate, THF: Tetrahydrofuran, CC: Cyanuric chloride, Cur: Curcumin, DHB: 2,4-dihydroxyBenzophenone

**Table S4.** Analysis data of synthesized compounds CU-1, CU-2, CU-3, CU-4, CU-5 and CU-6.

| Compounds                                                     | CU-1                                                                                                                                                                                                                                                                                                                                                                      | CU-2                                                                                                                                                                                                                                                                                                                                                                            | CU-3                                                                                                                                                                                                                                                                                                                                                                               |
|---------------------------------------------------------------|---------------------------------------------------------------------------------------------------------------------------------------------------------------------------------------------------------------------------------------------------------------------------------------------------------------------------------------------------------------------------|---------------------------------------------------------------------------------------------------------------------------------------------------------------------------------------------------------------------------------------------------------------------------------------------------------------------------------------------------------------------------------|------------------------------------------------------------------------------------------------------------------------------------------------------------------------------------------------------------------------------------------------------------------------------------------------------------------------------------------------------------------------------------|
| <b>FTIR</b><br>(KBr) cm <sup>-1</sup>                         | 3403 (N-H str. secondary amine), 3230 (N-H str. amide), 3075 (C-H aromatic), 2921 (C-H str. aliphatic), 1644 (C=O str. carbonyl group amide), 1598 (C=O str. ketone), 1575 (amide I), 1528 (amide II), 1513, 1451 (C=C str. Aromatic), 1271 (C-N str.).                                                                                                                   | 3419 (N-H str. secondary amine), 3210 (N-H str. amide), 3075 (C-H aromatic), 2930 (C-H str. aliphatic), 1685 (C=O str. carbonyl group amide), 1601 (C=O str. ketone), 1578 (amide I), 1527 (amide II), 1510, 1451 (C=C str. aromatic), 1268 (C-N str.).                                                                                                                         | 3426 (N-H str. secondary amine), 3180 (N-H str. amide), 3073 (C-H aromatic), 2927 (C-H str. aliphatic), 1690 (C=O str. carbonyl group amide), 1627 (C=O str. ketone), 1587 (amide I), 1527 (amide II), 1510, 1458 (C=C str. aromatic), 1274 (C-N str.).                                                                                                                            |
| <b><sup>1</sup>HNMR</b><br>(DMSO-d <sub>6</sub> ,500MHz, ppm) | 7.32-7.65 (48H, aromatic), 3.05 (4H, CONH), 3.82 (48H, OCH <sub>3</sub> ), 6.07 (16H, CH=CH), 6.87 (16H, Ph-CH=CH), 6.74 (16H, COCH <sub>2</sub> CO), 9.76 (8H, Ph-OH), 4.20 (4H, NCH <sub>2</sub> CH <sub>2</sub> N), 2.88 (16H, NCH <sub>2</sub> CH <sub>2</sub> ), 3.74 (16H, CH <sub>2</sub> NH), 3.12 (4H, CH <sub>2</sub> NH).                                      | 7.14-7.56 (96H, aromatic), 2.88 (12H, CONH), 3.84 (96H, OCH <sub>3</sub> ), 6.07 (32H, CH=CH), 6.85 (32H, Ph-CH=CH), 6.77 (32H, COCH <sub>2</sub> CO), 9.73 (16H, Ph-OH), 4.10 (4H, NCH <sub>2</sub> CH <sub>2</sub> N), 2.62 (48H, NCH <sub>2</sub> CH <sub>2</sub> ), 3.39 (48H, CH <sub>2</sub> NH), 3.05 (8H, CH <sub>2</sub> NH).                                          | 7.14-7.54 (192H, aromatic), 2.99 (28H, CONH), 3.88 (192H, OCH <sub>3</sub> ), 6.06 (64H, CH=CH), 6.87 (64H, Ph-CH=CH), 6.78 (64H, COCH <sub>2</sub> CO), 9.75 (32H, Ph-OH), 4.26 (4H, NCH <sub>2</sub> CH <sub>2</sub> N), 2.62 (112H, NCH <sub>2</sub> CH <sub>2</sub> ), 3.57 (112H, CH <sub>2</sub> NH), 3.08 (16H, CH <sub>2</sub> NH).                                        |
| <b><sup>13</sup>CNMR</b><br>(DMSO-D <sub>6</sub> ,500MHz ppm) | 182.6, 177.5, 149.3, 148.8, 147.4, 140.1, 122.3, 120.5, 115.1, 111.2, 55.1, 54.3, 46.8, 41.1, 35.9, 27.2, 18.5.                                                                                                                                                                                                                                                           | 182.6, 177.5, 149.3, 148.8, 147.4, 140.1, 122.5, 120.5, 115.1, 110.7, 55.1, 54.6, 44.8, 42.3, 35.2, 27.5, 18.9.                                                                                                                                                                                                                                                                 | 182.6, 178.3, 149.3, 148.8, 147.4, 140.1, 122.5, 120.5, 115.4, 110.8, 55.1, 54.1, 44.8, 42.1, 39.5, 24.5, 18.9.                                                                                                                                                                                                                                                                    |
| <b>Elemental analysis</b>                                     | C <sub>202</sub> H <sub>196</sub> N <sub>22</sub> O <sub>52</sub> (MW 3764.05)<br>calculated: C 64.46, H 5.25, N 8.19%; found: C 64.40, H 5.18, N 8.19%.                                                                                                                                                                                                                  | C <sub>422</sub> H <sub>424</sub> N <sub>50</sub> O <sub>108</sub> (MW 7924.09)<br>calculated: C 63.96, H 5.39, N 8.84%; found: C 63.80, H 5.28, N 8.73%.                                                                                                                                                                                                                       | C <sub>862</sub> H <sub>880</sub> N <sub>106</sub> O <sub>220</sub> (MW 16244.66)<br>calculated: C 63.73, H 5.46, N 9.14%; found: C 63.60, H 5.49, N 9.20%.                                                                                                                                                                                                                        |
| <b>Yield (%)</b>                                              | 88                                                                                                                                                                                                                                                                                                                                                                        | 75                                                                                                                                                                                                                                                                                                                                                                              | 73                                                                                                                                                                                                                                                                                                                                                                                 |
| <b>M.P. (°C)</b>                                              | 249                                                                                                                                                                                                                                                                                                                                                                       | 273                                                                                                                                                                                                                                                                                                                                                                             | 287                                                                                                                                                                                                                                                                                                                                                                                |
| <b>ε<sub>max</sub> (l mol<sup>-1</sup>cm<sup>-1</sup>)</b>    | 165282                                                                                                                                                                                                                                                                                                                                                                    | 246143                                                                                                                                                                                                                                                                                                                                                                          | 370521                                                                                                                                                                                                                                                                                                                                                                             |
| Compounds                                                     | CU-4                                                                                                                                                                                                                                                                                                                                                                      | CU-5                                                                                                                                                                                                                                                                                                                                                                            | CU-6                                                                                                                                                                                                                                                                                                                                                                               |
| <b>FTIR</b><br>(KBr) cm <sup>-1</sup>                         | 3402: (N-H str. secondary amine), 3264 (N-H str. amide), 3052 (C-H aromatic), 2909 (C-H str. aliphatic), 1708 (C=O str. conj. ketone), 1651 (C=O str. carbonyl group amide), 1599 (C=O str. ketone), 1575 (amide I), 1528 (amide II), 1511, 1458 (C=C str. aromatic), 1278 (C-N str.).                                                                                    | 3416 (N-H str. secondary amine), 3255 (N-H str. amide), 3070 (C-H aromatic), 2938 (C-H str. aliphatic), 1717 (C=O str. conj. ketone), 1630 (C=O str. carbonyl group amide), 1601 (C=O str. ketone), 1578 (amide I), 1527 (amide II), 1511, 1443 (C=C str. aromatic), 1273 (C-N str.).                                                                                           | 3423 (N-H str. secondary amine), 3249 (N-H str. amide), 3065 (C-H aromatic), 2933 (C-H str. aliphatic), 1710 (C=O str. conj. ketone), 1630 (C=O str. carbonyl group amide), 1603 (C=O str. ketone), 1587 (amide I), 1527 (amide II), 1507, 1445 (C=C str. aromatic), 1277 (C-N str.).                                                                                              |
| <b><sup>1</sup>HNMR</b><br>(DMSO-d <sub>6</sub> ,500MHz, ppm) | 7.35-7.62 (56H, aromatic), 3.05 (4H, CONH), 3.82 (24H, OCH <sub>3</sub> ), 6.40 (8H, CH=CH), 6.78 (8H, Ph-CH=CH), 6.64 (8H, COCH <sub>2</sub> CO), 9.7 (4H, Ph-curcumin-OH), 10.33 (4H, Ph-benzophenone-OH), 4.14 (4H, NCH <sub>2</sub> CH <sub>2</sub> N), 2.88 (16H, NCH <sub>2</sub> CH <sub>2</sub> ), 3.74 (16H, CH <sub>2</sub> NH), 3.12 (4H, CH <sub>2</sub> NH). | 7.36-7.62 (112H, aromatic), 3.05 (12H, CONH), 3.79 (48H, OCH <sub>3</sub> ), 6.40 (16H, CH=CH), 6.74 (16H, Ph-CH=CH), 6.63 (16H, COCH <sub>2</sub> CO), 9.86 (8H, Ph-curcumin-OH), 10.56 (8H, Ph-benzophenone-OH), 4.20 (4H, NCH <sub>2</sub> CH <sub>2</sub> N), 2.65 (48H, NCH <sub>2</sub> CH <sub>2</sub> ), 3.70 (48H, CH <sub>2</sub> NH), 3.10 (8H, CH <sub>2</sub> NH). | 7.32-7.62(224H, aromatic), 3.03 (28H, CONH), 3.78 (96H, OCH <sub>3</sub> ), 6.42 (32H, CH=CH), 6.84 (32H, Ph-CH=CH), 6.74 (32H, COCH <sub>2</sub> CO), 9.88 (16H, Ph-curcumin-OH), 10.48(16H, Ph-benzophenone-OH), 4.13 (4H, NCH <sub>2</sub> CH <sub>2</sub> N), 2.66 (112H, NCH <sub>2</sub> CH <sub>2</sub> ), 3.57 (112H, CH <sub>2</sub> NH), 3.07 (16H, CH <sub>2</sub> NH). |
| <b><sup>13</sup>CNMR</b><br>(DMSO-D <sub>6</sub> ,500MHz ppm) | 198.1, 183.6, 177.2, 163.9, 149.3, 137.4, 134.7, 131.0, 128.1, 127.8, 111.9, 55.1, 53.9, 44.8, 42.4, 35.9, 27.8, 18.9                                                                                                                                                                                                                                                     | 198.1, 188.2, 178.2, 164.2, 149.7, 137.5, 134.7, 130.99, 128.1, 127.8, 111.9, 55.8, 53.7, 44.8, 40.7, 35.2, 27.5, 18.9                                                                                                                                                                                                                                                          | 198.2, 188.6, 178.9, 164.4, 149.4, 148.8, 147.4, 130.9, 128.1, 127.8, 111.9, 55.1, 52.6, 44.8, 40.6, 35.9, 24.5, 18.5                                                                                                                                                                                                                                                              |
| <b>Elemental analysis</b>                                     | C <sub>170</sub> H <sub>156</sub> N <sub>22</sub> O <sub>40</sub> (MW:3147.15)<br>calculated: C 64.88, H 4.99, N 9.79%; found: C 64.80, H 4.93, N 9.69%.                                                                                                                                                                                                                  | C <sub>358</sub> H <sub>344</sub> N <sub>50</sub> O <sub>84</sub> (MW:6691.11)<br>calculated: C 64.26, H 5.18, N 10.46%; found C 64.20, H 5.19, N 10.42%.                                                                                                                                                                                                                       | C <sub>734</sub> H <sub>720</sub> N <sub>106</sub> O <sub>172</sub> (MW:13778.08)<br>calculated: C 63.98, H 5.26, N 10.77%; found C 63.80, H 5.19, N 10.72%.                                                                                                                                                                                                                       |
| <b>Yield (%)</b>                                              | 73                                                                                                                                                                                                                                                                                                                                                                        | 70                                                                                                                                                                                                                                                                                                                                                                              | 70                                                                                                                                                                                                                                                                                                                                                                                 |
| <b>M.P. (°C)</b>                                              | 222                                                                                                                                                                                                                                                                                                                                                                       | 264                                                                                                                                                                                                                                                                                                                                                                             | 278                                                                                                                                                                                                                                                                                                                                                                                |
| <b>ε<sub>max</sub> (l mol<sup>-1</sup>cm<sup>-1</sup>)</b>    | 122857                                                                                                                                                                                                                                                                                                                                                                    | 188936                                                                                                                                                                                                                                                                                                                                                                          | 295412                                                                                                                                                                                                                                                                                                                                                                             |
